# Supplementary material for: Assessing locations susceptible to shallow landslide initiation during prolonged intense rainfall in the Lares, Utuado, and Naranjito municipalities of Puerto Rico
Source: Copernicus journal article supplement (doi:10.5194/nhess-24-1579-2024), 2024-05-06
Supplement: Supplementary file 3 [file nhess-24-1579-2024-supplement.zip]

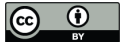

*Supplement of*

**Assessing locations susceptible to shallow landslide initiation during prolonged intense rainfall in the Lares, Utuado, and Naranjito municipalities of Puerto Rico**

**Rex L. Baum et al.**

*Correspondence to:* Rex L. Baum (baum@usgs.gov)

- nhess-24-1579-2024-supplement-title-page.pdf
- Fig\_S1.jpg
- Fig\_S2.jpg
- Fig\_S3.pdf
- Fig\_S4.pdf
- SupplementalText.pdf

The copyright of individual parts of the supplement might differ from the article licence.
