# Supplementary material for: Assessing locations susceptible to shallow landslide initiation during prolonged intense rainfall in the Lares, Utuado, and Naranjito municipalities of Puerto Rico
Source: Copernicus journal article supplement (doi:10.5194/nhess-24-1579-2024), 2024-05-06
Supplement: Supplementary file 4 [file nhess-24-1579-2024-supplement.zip]

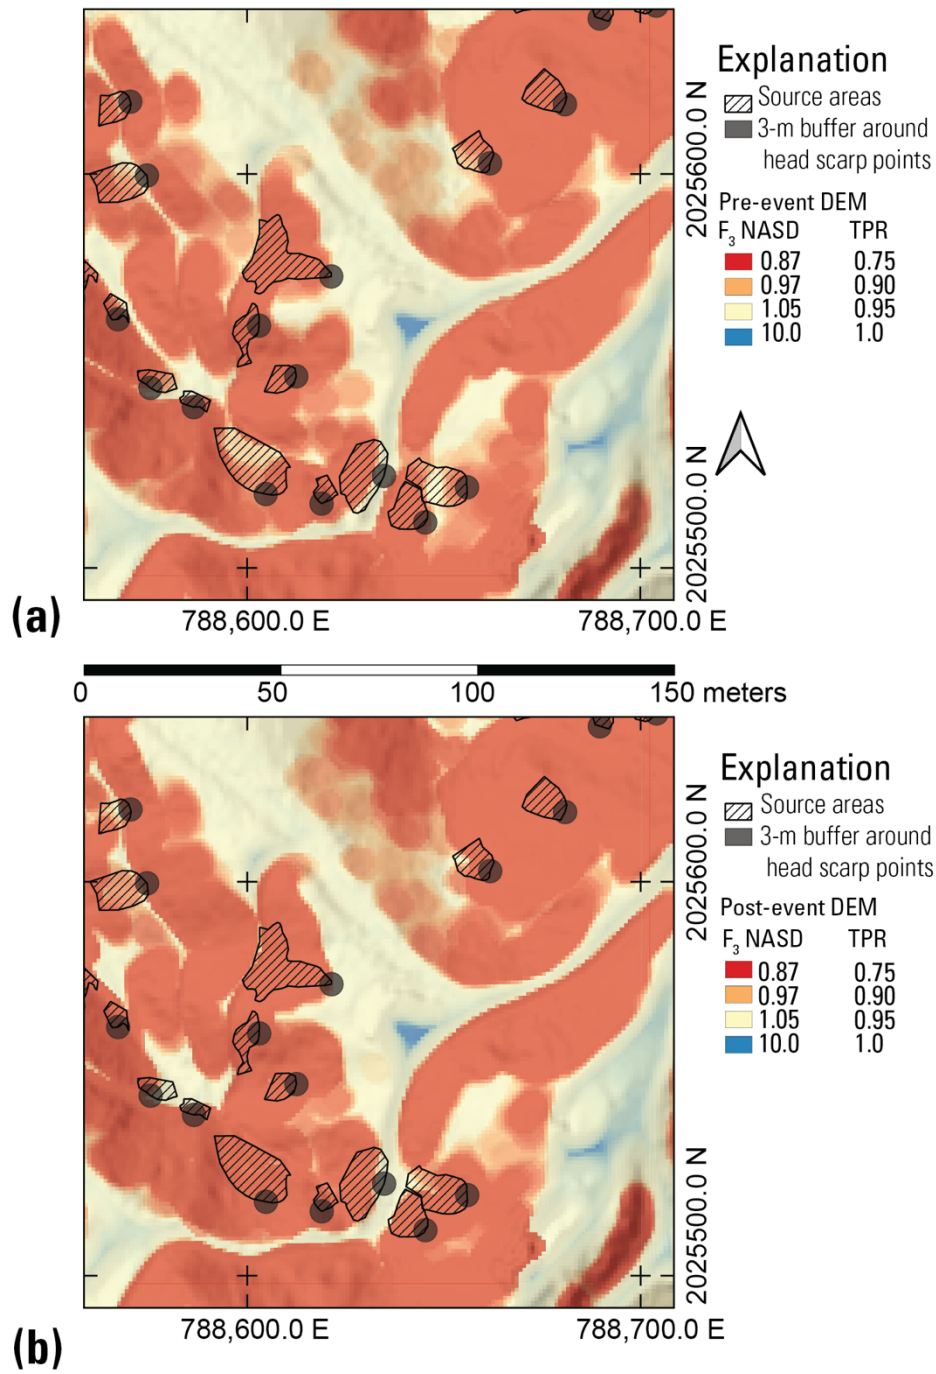

Figure S4. Enlarged view of inset map area of Figures 10 and 11 comparing quasi-three-dimensional (3D) susceptibility model results for pre-event and post-event 1-m digital elevation models (DEM), (a)  $F_3$  for modified NASD soil-depth model based on pre-event DEM, (b)  $F_3$  for modified NASD soil-depth model based on post-event DEM. Source areas (mapped from aerial imagery with the aid of pre-event and post-event lidar) are from Baxstrom et al (2021a) and head scarp points are from Hughes et al. 2019.
