# Supplementary material for: Assessing locations susceptible to shallow landslide initiation during prolonged intense rainfall in the Lares, Utuado, and Naranjito municipalities of Puerto Rico
Source: Copernicus journal article supplement (doi:10.5194/nhess-24-1579-2024), 2024-05-06
Supplement: Supplementary file 5 [file nhess-24-1579-2024-supplement.zip]

Archive with 6 entries (6 files):
- nhess-24-1579-2024-supplement-title-page.pdf
- Fig_S4.pdf
- Fig_S1.jpg
- Fig_S3.pdf
- SupplementalText.pdf
- Fig_S2.jpg
