# Supplementary figures and images for: Assessing locations susceptible to shallow landslide initiation during prolonged intense rainfall in the Lares, Utuado, and Naranjito municipalities of Puerto Rico
Source: Copernicus journal article supplement (doi:10.5194/nhess-24-1579-2024), 2024-05-06

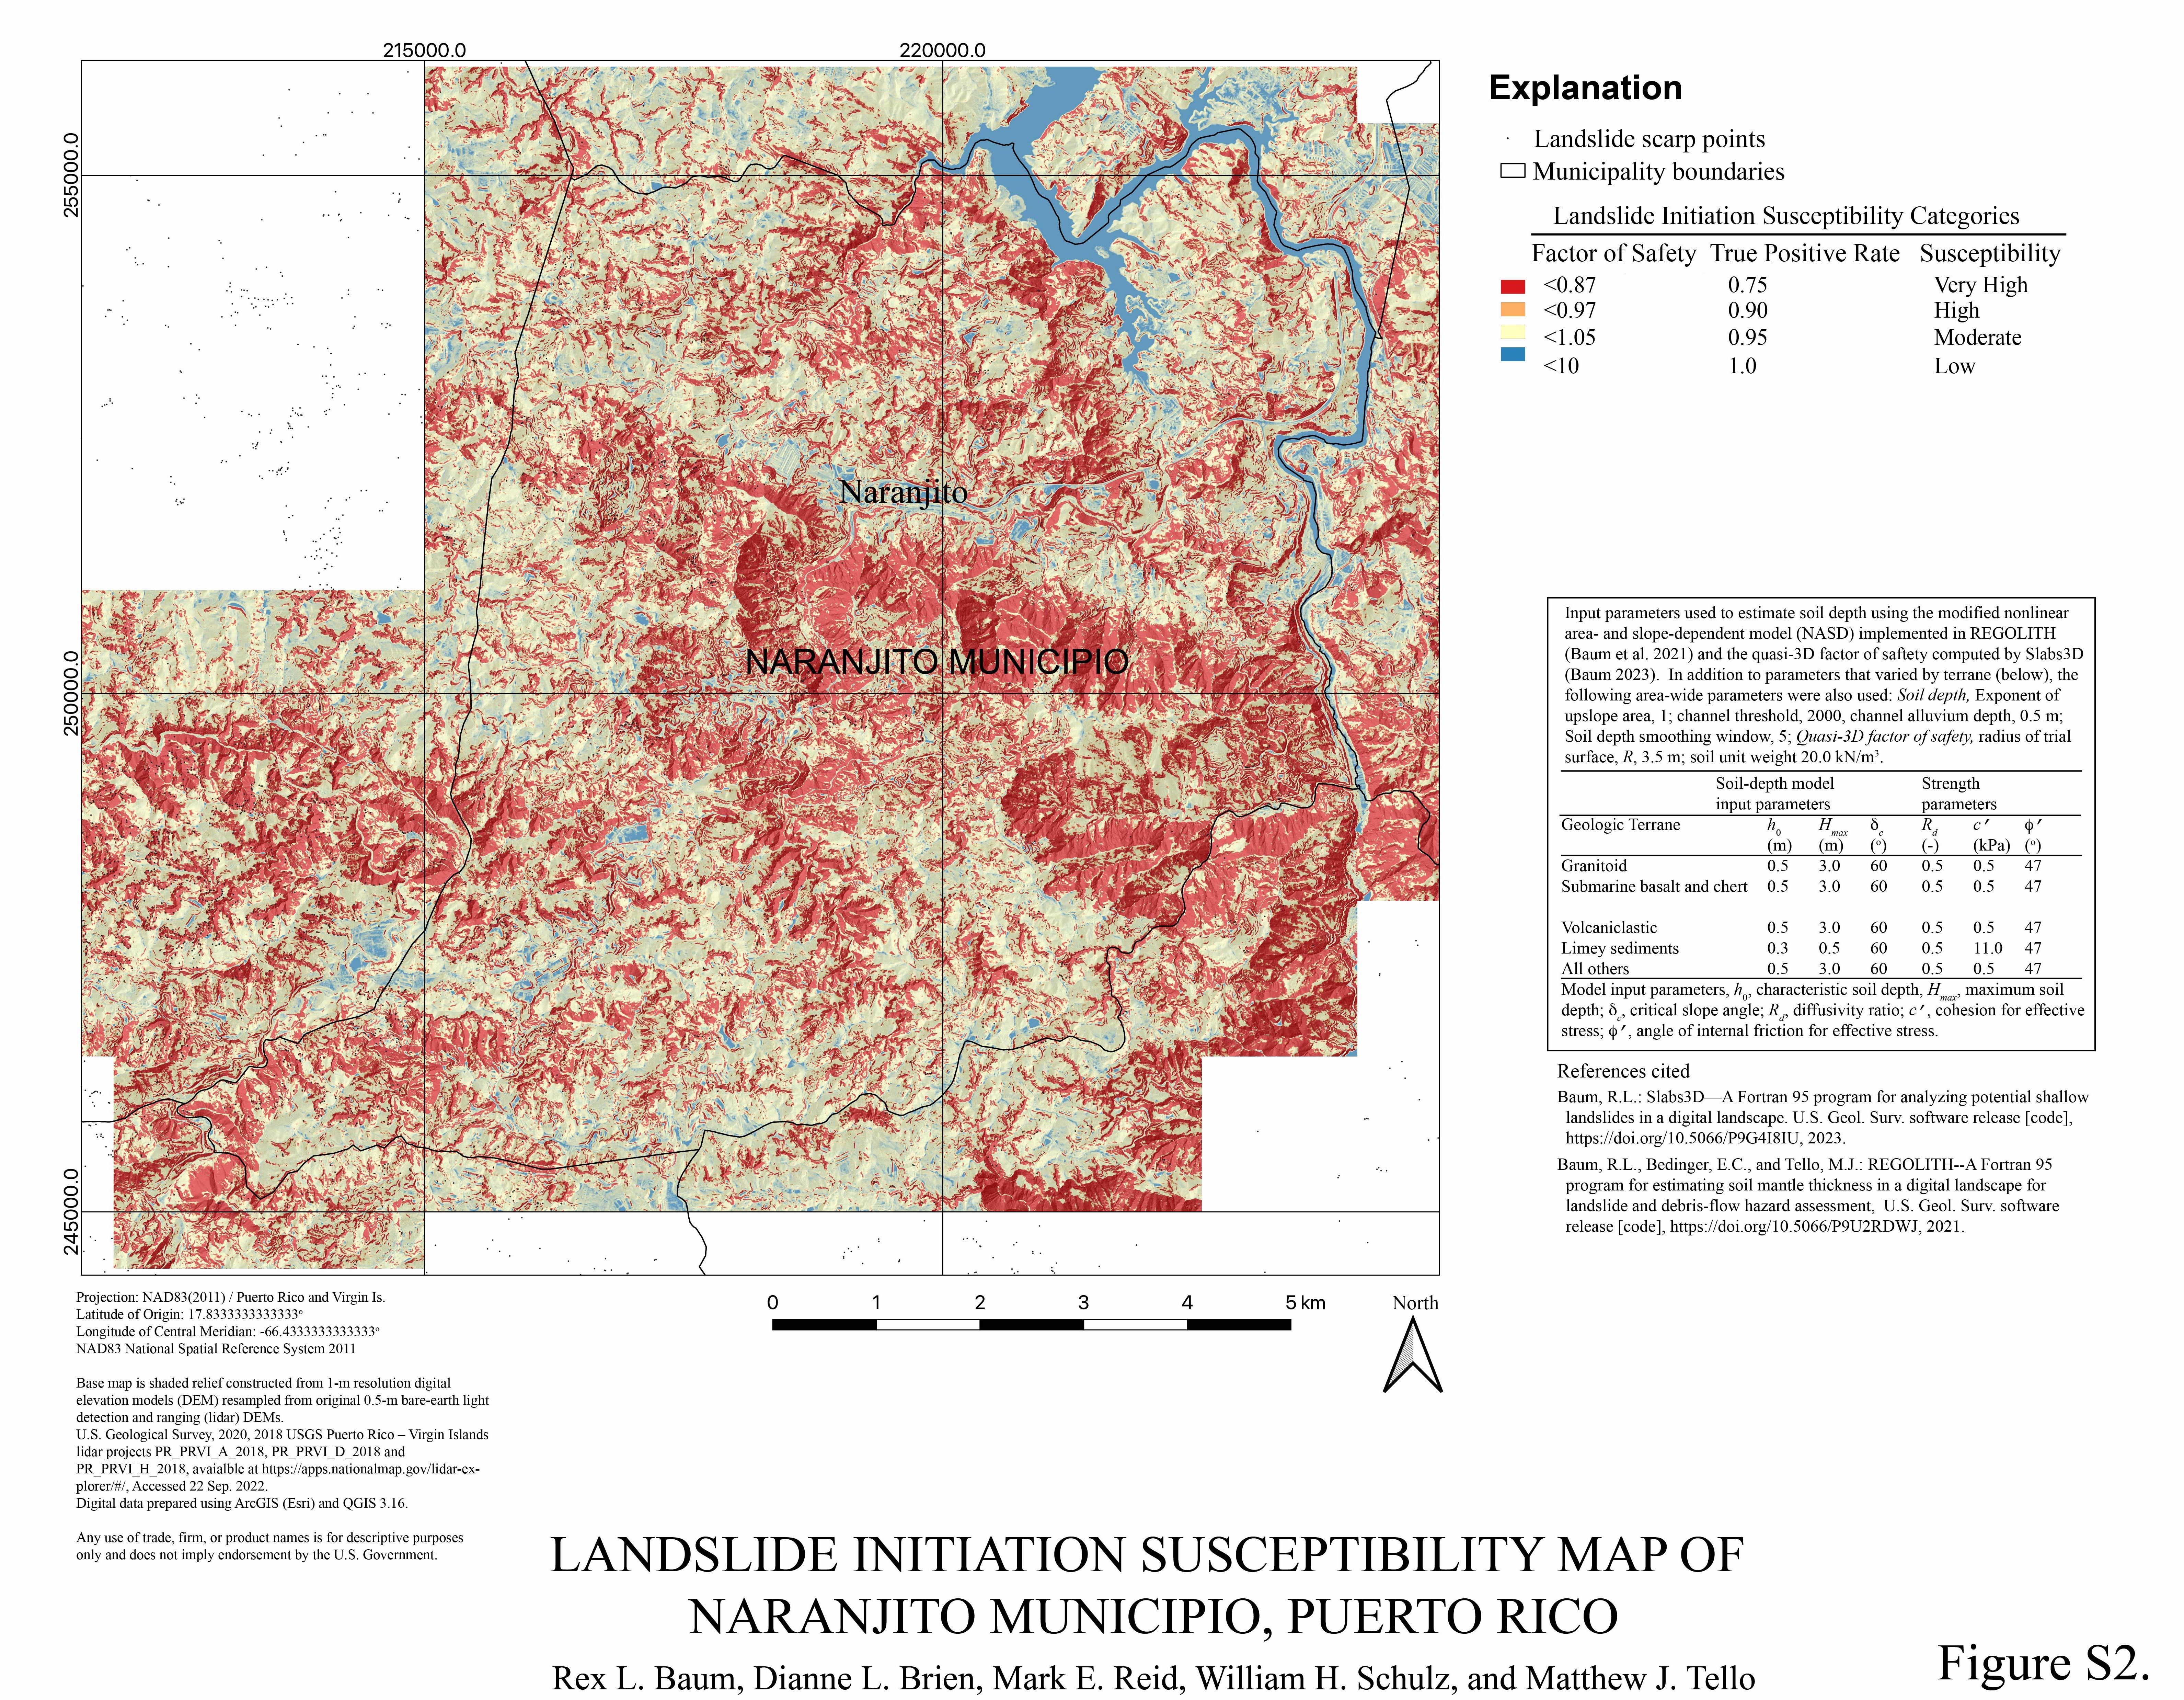

Supplement: Supplementary file 5 [file nhess-24-1579-2024-supplement.zip › Fig_S2.jpg]
